# Supplementary material for: Probing the structure–property relationships of supported copper oxide nanoclusters for methane activation
Source: Royal Society of Chemistry journal article supplement (doi:10.1039/d3ey00234a), 2023-11-16
Supplement: d3ey00234a6.pdf [file d3ey00234a6.pdf]

## Supporting Information

# Probing the Structure–Property Relationships of Supported Copper Oxide Nanoclusters for Methane Activation

Xijun Wang, Kaihang Shi, Anyang Peng, and Randall Q. Snurr\*

Department of Chemical and Biological Engineering, Northwestern University, Evanston, IL 60208,  
USA

\*Email: [snurr@northwestern.edu](mailto:snurr@northwestern.edu)

**Keywords:** Copper oxide, nanocluster, methane activation, heterogeneous catalysis, electronic structure, descriptor

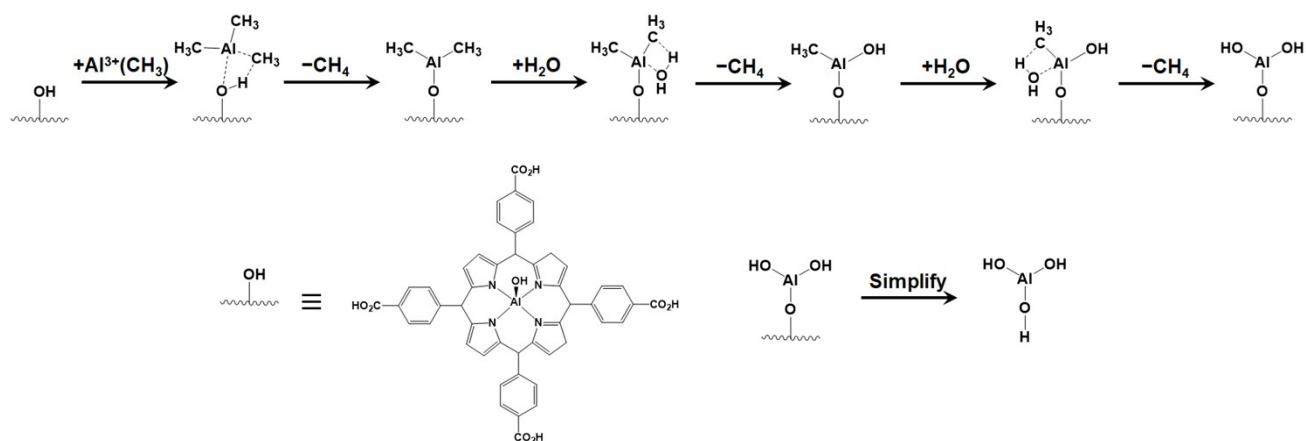

**Fig. S1.** Proposed mechanism for the aluminum (III) ALD process.

In our previous study,<sup>1</sup> we constructed the support model using aluminum(III) hydroxo tetrakis (4-carboxyphenyl) porphyrin ( $\text{Al}^{\text{III}}(\text{OH})\text{-TCPP}$ ). This model was derived by cutting the Fe-TCPP linker from the crystal structure of the PCN-222(Fe) MOF<sup>2</sup> and substituting the Fe with the more readily modeled Al. To simplify the support model further, we substituted the  $\text{Al}^{\text{III}}\text{-TCPP}$  moiety with a hydrogen atom, given that this simplification has a negligible impact on the energetics associated with methane activation.<sup>1</sup> For instance, the activation barrier of methane on a certain di-copper oxide nanocluster is 59.5 kJ/mol with the  $\text{Al}^{\text{III}}(\text{OH})\text{-TCPP}$  support, versus 57.0 kJ/mol when substituting the support with a hydrogen atom. Although the hydrogen atom serves as a model for the substrate in our calculations, fixing a single atom in DFT is essentially the same as allowing full relaxation of all atoms. As such, our approach involves the complete relaxation of all atoms.

**Table. S1.** Relative free energies at 473 K (in kJ/mol) for the key tetra-copper oxide nanoclusters at relevant spin states. For each nanocluster, the most stable spin state is set as the energy reference.

The notation  $\langle \hat{S}^2 \rangle$  represents the expectation value of the squared total spin operator for the most stable spin state of each nanocluster.

| Spin multiplicity | 1     | 2 | 3           | 4 | 5           | 6 | $\langle \hat{S}^2 \rangle$ |
|-------------------|-------|---|-------------|---|-------------|---|-----------------------------|
| <b>Ref</b>        | 12.82 | – | <b>0.00</b> | – | 150.27      | – | 2.0002                      |
| <b>I</b>          | 74.36 | – | 20.29       | – | <b>0.00</b> | – | 6.0003                      |
| <b>II</b>         | 75.74 | – | 18.96       | – | <b>0.00</b> | – | 6.0003                      |
| <b>III</b>        | 4.19  | – | 3.63        | – | <b>0.00</b> | – | 6.0002                      |
| <b>IV</b>         | 81.31 | – | <b>0.00</b> | – | 5.07        | – | 2.0238                      |
| <b>V</b>          | 78.05 | – | <b>0.00</b> | – | 5.28        | – | 2.0422                      |
| <b>VI</b>         | 10.57 | – | 3.72        | – | <b>0.00</b> | – | 6.0002                      |
| <b>VII</b>        | 13.25 | – | 7.72        | – | <b>0.00</b> | – | 6.0001                      |
| <b>VIII</b>       | 9.51  | – | 9.09        | – | <b>0.00</b> | – | 6.0001                      |
| <b>IX</b>         | 2.28  | – | <b>0.00</b> | – | 10.89       | – | 2.0242                      |
| <b>I.1</b>        | 20.94 | – | 6.02        | – | <b>0.00</b> | – | 6.0003                      |

|      |        |   |       |   |       |   |        |
|------|--------|---|-------|---|-------|---|--------|
| I.2  | 4.55   | - | 3.82  | - | 0.00  | - | 6.0002 |
| I.3  | 74.56  | - | 19.23 | - | 0.00  | - | 6.0003 |
| I.4  | 23.22  | - | 20.70 | - | 0.00  | - | 6.0006 |
| I.5  | 15.72  | - | 12.74 | - | 0.00  | - | 6.0004 |
| I.6  | 25.11  | - | 16.98 | - | 0.00  | - | 6.0004 |
| I.7  | 36.40  | - | 12.84 | - | 0.00  | - | 6.0004 |
| I.8  | 28.57  | - | 7.96  | - | 0.00  | - | 6.0004 |
| I.9  | 72.01  | - | 10.78 | - | 0.00  | - | 6.0003 |
| I.10 | 43.47  | - | 0.00  | - | 1.23  | - | 2.0029 |
| I.11 | 18.00  | - | 14.01 | - | 0.00  | - | 6.0003 |
| I.12 | 69.90  | - | 17.50 | - | 0.00  | - | 6.0003 |
| I.13 | 48.66  | - | 0.00  | - | 7.21  | - | 2.0096 |
| I.14 | 72.14  | - | 0.61  | - | 0.00  | - | 6.0003 |
| I.15 | 48.78  | - | 0.00  | - | 2.69  | - | 2.0390 |
| I.16 | 50.59  | - | 13.33 | - | 0.00  | - | 6.0003 |
| I.17 | 51.14  | - | 2.03  | - | 0.00  | - | 6.0003 |
| I.18 | 10.43  | - | 0.00  | - | 0.98  | - | 2.0390 |
| I.19 | 92.70  | - | 16.88 | - | 0.00  | - | 6.0003 |
| I.20 | 73.87  | - | 0.15  | - | 0.00  | - | 6.0003 |
| I.21 | 71.96  | - | 2.39  | - | 0.00  | - | 6.0003 |
| I.22 | 12.07  | - | 20.02 | - | 0.00  | - | 6.0003 |
| I.23 | 11.09  | - | 7.09  | - | 0.00  | - | 6.0003 |
| I.24 | 13.01  | - | 12.80 | - | 0.00  | - | 6.0003 |
| I.25 | 5.21   | - | 5.17  | - | 0.00  | - | 6.0003 |
| I.26 | 5.24   | - | 13.38 | - | 0.00  | - | 6.0003 |
| I.27 | 5.46   | - | 11.93 | - | 0.00  | - | 6.0003 |
| I.28 | 23.98  | - | 9.42  | - | 0.00  | - | 6.0003 |
| I.29 | 5.46   | - | 11.88 | - | 0.00  | - | 6.0003 |
| I.30 | 45.77  | - | 0.00  | - | 8.97  | - | 2.0103 |
| I.31 | 74.90  | - | 0.00  | - | 25.53 | - | 2.0329 |
| I.32 | 24.78  | - | 10.92 | - | 0.00  | - | 6.0003 |
| I.33 | 53.58  | - | 3.07  | - | 0.00  | - | 6.0004 |
| I.34 | 16.92  | - | 11.96 | - | 0.00  | - | 6.0004 |
| I.35 | 62.43  | - | 26.71 | - | 0.00  | - | 6.0003 |
| I.36 | 8.64   | - | 6.03  | - | 0.00  | - | 6.0003 |
| I.37 | 61.17  | - | 10.96 | - | 0.00  | - | 6.0003 |
| I.38 | 19.27  | - | 16.78 | - | 0.00  | - | 6.0003 |
| I.39 | 65.63  | - | 14.51 | - | 0.00  | - | 6.0005 |
| I.40 | 103.57 | - | 18.29 | - | 0.00  | - | 6.0004 |
| I.41 | 80.21  | - | 4.34  | - | 0.00  | - | 6.0003 |
| I.42 | 49.19  | - | 5.69  | - | 0.00  | - | 6.0003 |
| I.43 | 62.11  | - | 18.81 | - | 0.00  | - | 6.0003 |
| I.44 | 44.75  | - | 0.00  | - | 6.13  | - | 2.0095 |
| I.45 | 50.53  | - | 6.53  | - | 0.00  | - | 6.0003 |
| I.46 | 88.93  | - | 30.09 | - | 0.00  | - | 6.0004 |
| I.47 | 71.41  | - | 36.40 | - | 0.00  | - | 6.0004 |
| I.48 | 61.70  | - | 0.00  | - | 12.72 | - | 2.0176 |
| I.49 | 55.46  | - | 6.10  | - | 0.00  | - | 6.0003 |
| I.50 | 77.17  | - | 25.23 | - | 0.00  | - | 6.0004 |
| I.51 | 75.83  | - | 0.00  | - | 19.45 | - | 2.0197 |
| I.52 | 75.12  | - | 0.00  | - | 18.19 | - | 2.0196 |
| I.53 | 88.58  | - | 18.87 | - | 0.00  | - | 6.0004 |
| I.54 | 75.13  | - | 0.00  | - | 26.77 | - | 2.0198 |
| I.55 | 73.21  | - | 23.56 | - | 0.00  | - | 6.0004 |
| I.56 | 59.65  | - | 18.80 | - | 0.00  | - | 6.0004 |
| I.57 | 88.13  | - | 12.24 | - | 0.00  | - | 6.0004 |
| I.58 | 90.35  | - | 10.97 | - | 0.00  | - | 6.0006 |
| I.59 | 88.48  | - | 11.64 | - | 0.00  | - | 6.0006 |
| I.60 | 75.91  | - | 0.00  | - | 19.37 | - | 2.0198 |
| I.61 | 87.96  | - | 12.80 | - | 0.00  | - | 6.0004 |

|      |       |   |       |   |          |   |        |
|------|-------|---|-------|---|----------|---|--------|
| I.62 | 85.60 | – | 12.24 | – | 0.00     | – | 6.0004 |
| I.63 | 88.23 | – | 12.75 | – | 0.00     | – | 6.0004 |
| I.64 | 78.66 | – | 0.22  | – | 0.00     | – | 6.0005 |
| V.1  | 82.54 | – | 6.81  | – | 0.00     | – | 6.0002 |
| V.2  | 29.87 | – | 0.00  | – | 40.14    | – | 2.0003 |
| V.3  | 36.99 | – | 0.00  | – | 43.06    | – | 2.0003 |
| V.4  | 31.72 | – | 0.00  | – | 47.68    | – | 2.0003 |
| V.5  | 46.72 | – | 0.00  | – | 49.70    | – | 2.0002 |
| V.6  | 36.62 | – | 0.00  | – | 11.49    | – | 2.0029 |
| V.7  | 37.61 | – | 0.00  | – | 17.81    | – | 2.0079 |
| V.8  | 39.47 | – | 0.00  | – | 45.55    | – | 2.0169 |
| V.9  | 16.32 | – | 0.00  | – | 6.35     | – | 2.0039 |
| V.10 | 21.75 | – | 0.00  | – | Unstable | – | 2.0001 |
| V.11 | 0.00  | – | 19.34 | – | 54.11    | – | 0.0000 |
| V.12 | 10.26 | – | 43.00 | – | 0.00     | – | 6.0001 |
| V.13 | 49.08 | – | 11.62 | – | 0.00     | – | 6.0001 |
| V.14 | 37.64 | – | 95.70 | – | 0.00     | – | 6.0001 |
| V.15 | 5.72  | – | 0.00  | – | Unstable | – | 2.0001 |
| V.16 | 1.47  | – | 0.22  | – | 0.00     | – | 6.0001 |
| V.17 | 15.60 | – | 2.02  | – | 0.00     | – | 6.0001 |
| V.18 | 0.00  | – | 2.48  | – | Unstable | – | 2.0058 |
| V.19 | 25.19 | – | 0.00  | – | 6.40     | – | 2.0073 |

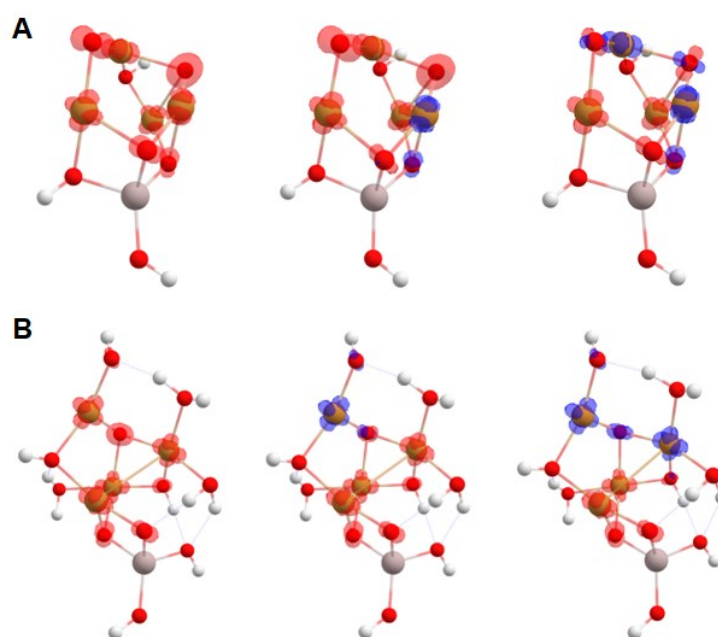

**Fig. S2.** Possible spin density distribution of configurations (A) I.9 and (B) V.1. The structures from left to right represent the high spin (ferromagnetic) state, followed by the ferrimagnetic and antiferromagnetic broken spin states. Red and blue bubbles denote unpaired spin-up and spin-down electrons, respectively. Refer to **Table S2** for the corresponding exchange coupling constants.

**Table S2.** Computed parameters and exchange coupling constants associated with the broken symmetry for possible spin states of I.9 and V.1. Refer to **Fig. S2** for the corresponding spin density visualizations.

| System                | High-spin (HS) $\langle S^2 \rangle$ | Broken symmetry (BS) $\langle S^2 \rangle$ | $S_{max}$ | $E_{HS} - E_{BS}$ (eV) | Exchange coupling Constant ( $J$ ) (cm <sup>-1</sup> )* |
|-----------------------|--------------------------------------|--------------------------------------------|-----------|------------------------|---------------------------------------------------------|
| I.9 Ferrimagnetic     | 6.03                                 | 2.94                                       | 2         | -0.10                  | 204.34                                                  |
| I.9 Antiferromagnetic | 6.03                                 | 1.89                                       | 2         | -0.27                  | 551.06                                                  |
| V.1 Ferrimagnetic     | 6.02                                 | 2.92                                       | 2         | -0.05                  | 101.97                                                  |
| V.1 Antiferromagnetic | 6.02                                 | 1.93                                       | 2         | -0.05                  | 107.89                                                  |

\*Computed with ORCA package<sup>3</sup> using the formula  $J = -(E_{HS} - E_{BS})/S_{max}^2$ ,<sup>4-6</sup>

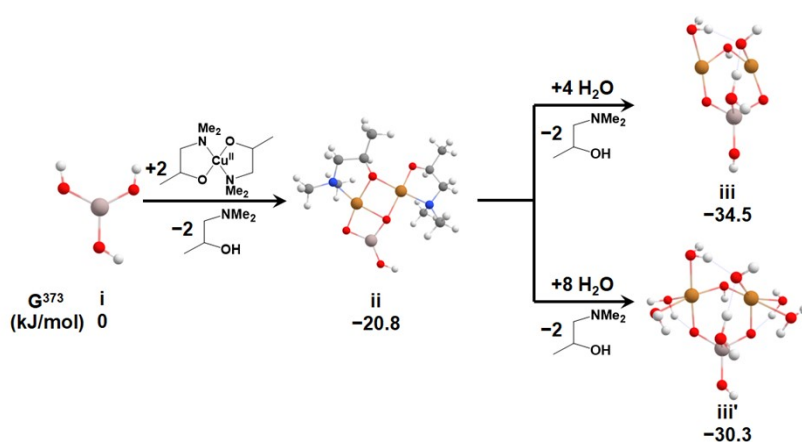

**Fig. S3.** Comparison of the Gibbs free energies for iii ( $Cu_2AlO_7H_7$ ) and iii' ( $Cu_2AlO_{11}H_{15}$ ) in the proposed ALD scheme at  $P_{Cu(dmap)_2} = P_{H_2O} = 1$  Torr,  $P_{Hdmap} = 10^{-7}$  Torr, and  $T = 373$  K. Dark grey, blue, white, red, golden, and light peach spheres represent C, N, H, O, Cu, and Al atoms, respectively.

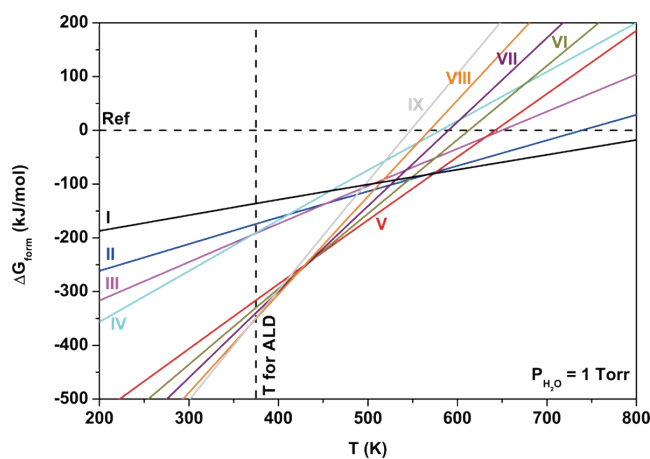

**Fig. S4.** Phase diagram of various  $Cu_4O$ -NCs at the experimental  $P_{H_2O}$  (1 Torr). Corresponding

structures are shown in **Fig. 2**.

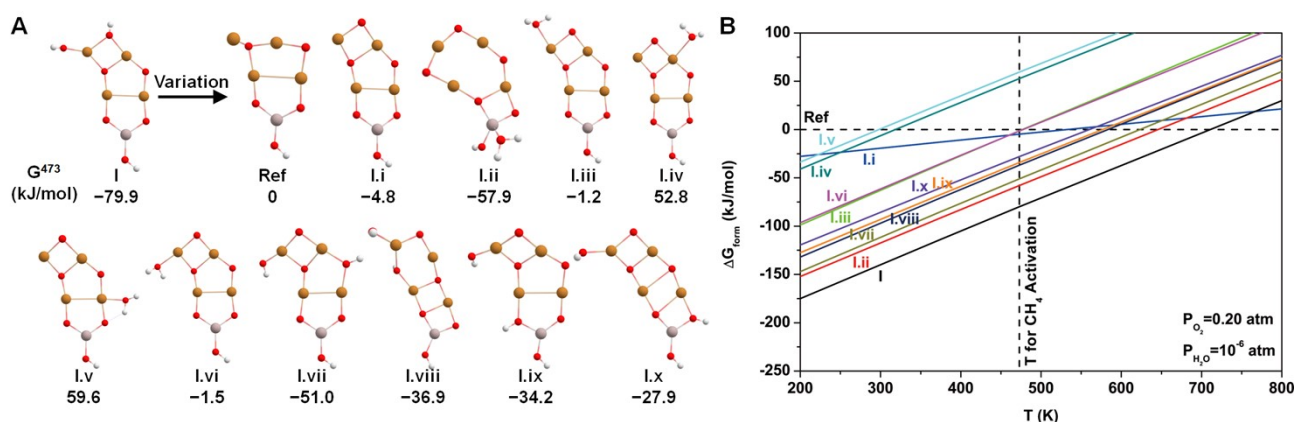

**Fig. S5.** (A) Optimized geometric structures and (B) corresponding phase diagram of configuration I and its variants. White, red, golden, and light peach spheres represent H, O, Cu, and Al atoms, respectively. The phase diagram was drawn at the experimental partial pressure of methane activation ( $P_{O_2} = 0.2$  atm,  $P_{H_2O} = 10^{-6}$  atm).

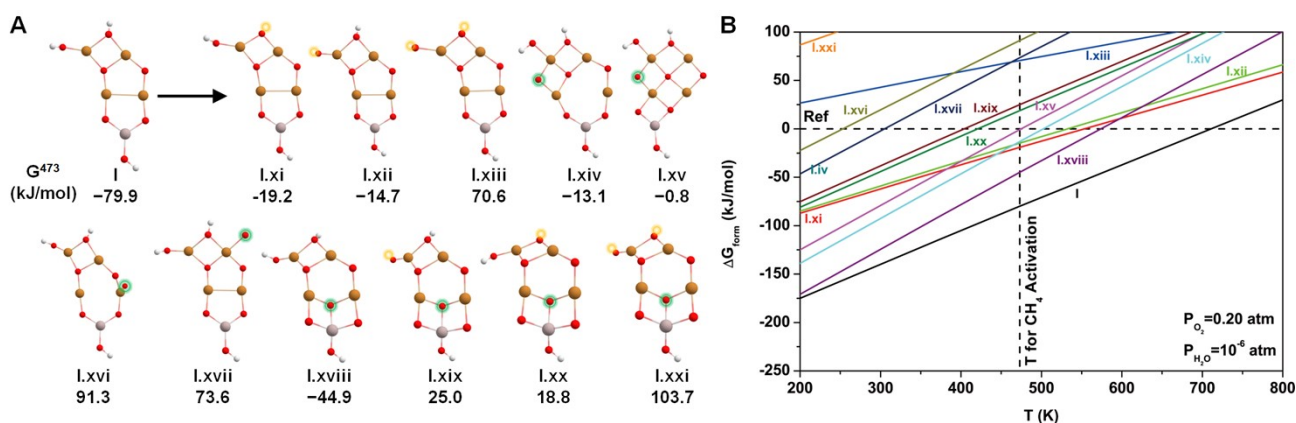

**Fig. S6.** (A) Optimized geometric structures and (B) corresponding phase diagram of configuration I and its variants obtained after oxidative dehydrogenation and/or oxidation on various sites of I. White, red, golden, and light peach spheres represent H, O, Cu, and Al atoms, respectively. Yellow and green bubbles denote hydrogen vacancy and additional oxygen atoms, respectively. The phase diagram was drawn at the experimental partial pressure of methane activation ( $P_{O_2} = 0.2$  atm,  $P_{H_2O} = 10^{-6}$  atm).

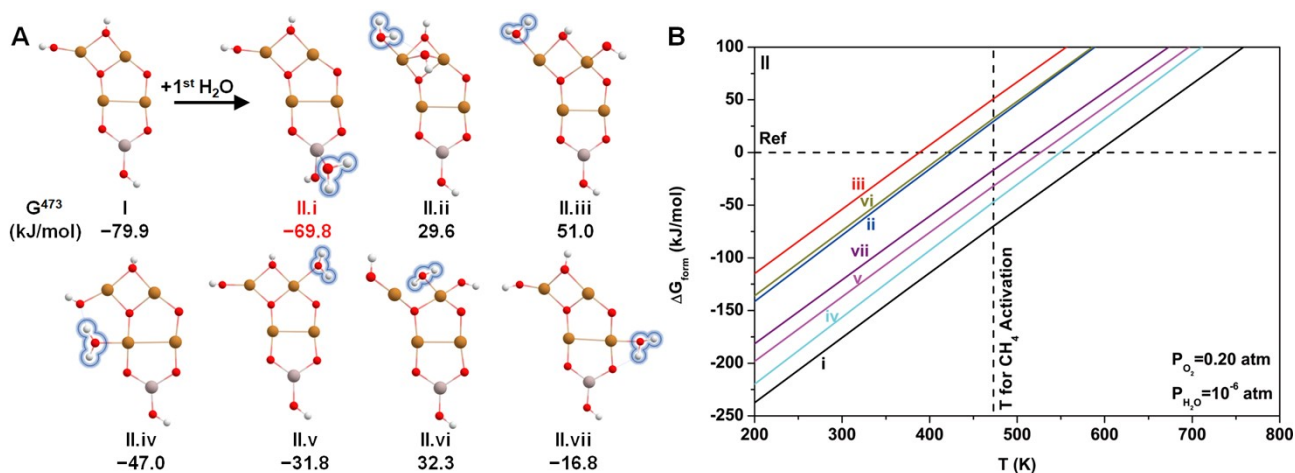

**Fig. S7.** (A) Optimized geometric structures and (B) corresponding phase diagram of the variants obtained by adding a  $H_2O$  (bubbles highlighted) on various sites of configuration I. White, red, golden, and light peach spheres represent H, O, Cu, and Al atoms, respectively. The phase diagram was drawn at the experimental partial pressure of methane activation ( $P_{O_2} = 0.2$  atm,  $P_{H_2O} = 10^{-6}$  atm). Configuration II.i is the most stable among these variants at the studied temperature range and thereby simplified as II.

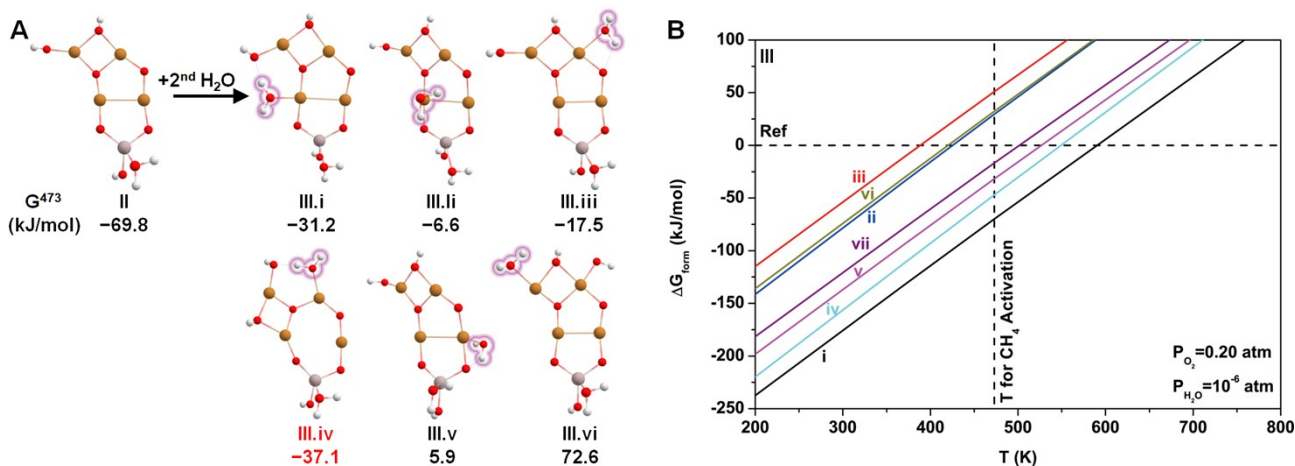

**Fig. S8.** (A) Optimized geometric structures and (B) corresponding phase diagram of the variants obtained by adding a  $H_2O$  (bubbles highlighted) on various sites of configuration II. White, red, golden, and light peach spheres represent H, O, Cu, and Al atoms, respectively. The phase diagram was drawn at the experimental partial pressure of methane activation ( $P_{O_2} = 0.2$  atm,  $P_{H_2O} = 10^{-6}$  atm). Configuration III.iv is the most stable among these variants at the studied temperature range and thereby simplified as III.

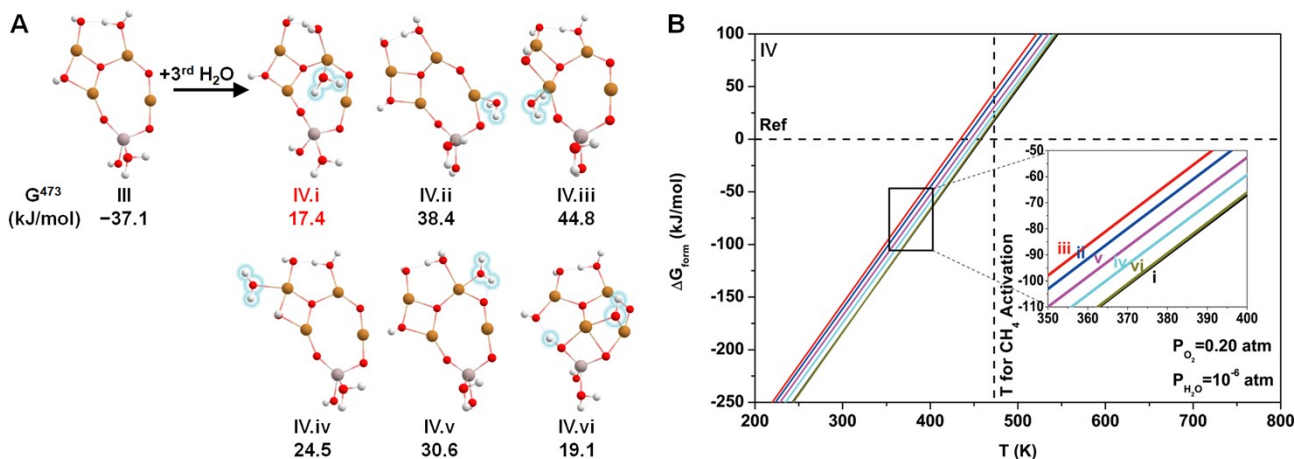

**Fig. S9.** (A) Optimized geometric structures and (B) corresponding phase diagram of the variants obtained by adding a H<sub>2</sub>O (bubbles highlighted) on various sites of configuration III. White, red, golden, and light peach spheres represent H, O, Cu, and Al atoms, respectively. The phase diagram was drawn at the experimental partial pressure of methane activation ( $P_{O_2} = 0.2$  atm,  $P_{H_2O} = 10^{-6}$  atm). Configuration IV.i is the most stable among these variants at the studied temperature range and thereby simplified as IV.

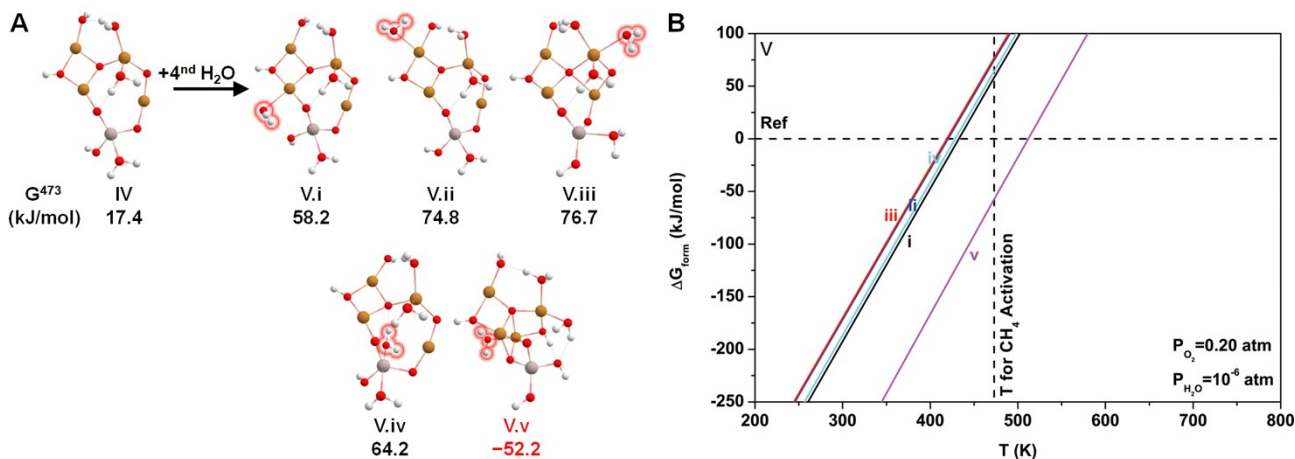

**Fig. S10.** (A) Optimized geometric structures and (B) corresponding phase diagram of the variants obtained by adding a H<sub>2</sub>O (bubbles highlighted) on various sites of configuration IV. White, red, golden, and light peach spheres represent H, O, Cu, and Al atoms, respectively. The phase diagram was drawn at the experimental partial pressure of methane activation ( $P_{O_2} = 0.2$  atm,  $P_{H_2O} = 10^{-6}$  atm). Configuration V.v is the most stable among these variants at the studied temperature range and



thereby simplified as V.

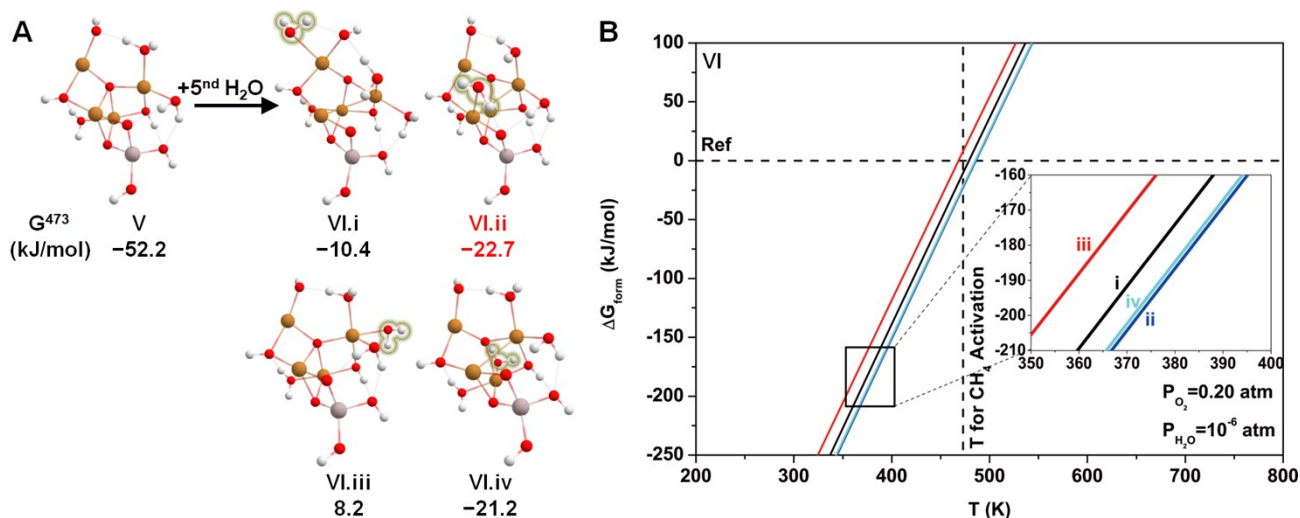

**Fig. S11.** (A) Optimized geometric structures and (B) corresponding phase diagram of the variants obtained by adding a H<sub>2</sub>O (bubbles highlighted) on various sites of configuration V. White, red, golden, and light peach spheres represent H, O, Cu, and Al atoms, respectively. The phase diagram was drawn at the experimental partial pressure of methane activation ( $P_{O_2} = 0.2$  atm,  $P_{H_2O} = 10^{-6}$  atm). Configuration VI.ii is the most stable among these variants at the studied temperature range and thereby simplified as VI.

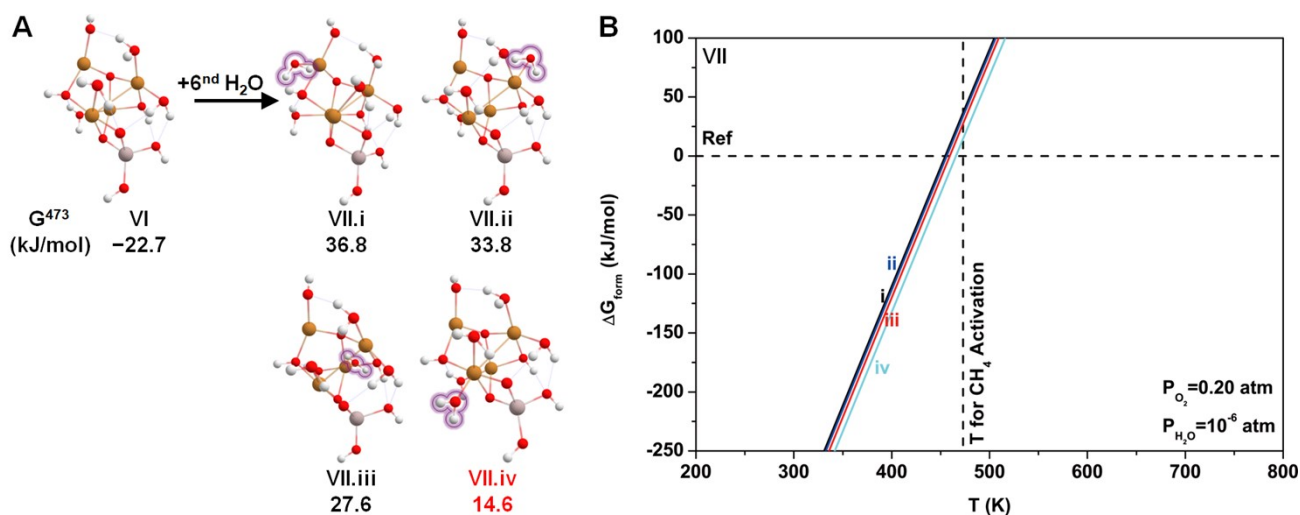

**Fig. S12.** (A) Optimized geometric structures and (B) corresponding phase diagram of the variants obtained by adding a H<sub>2</sub>O (bubbles highlighted) on various sites of configuration VI. White, red, golden, and light peach spheres represent H, O, Cu, and Al atoms, respectively. The phase diagram was drawn at the experimental partial pressure of methane activation ( $P_{O_2} = 0.2$  atm,  $P_{H_2O} = 10^{-6}$  atm).

atm). Configuration VII.iv is the most stable among these variants at the studied temperature range and thereby simplified as VII.

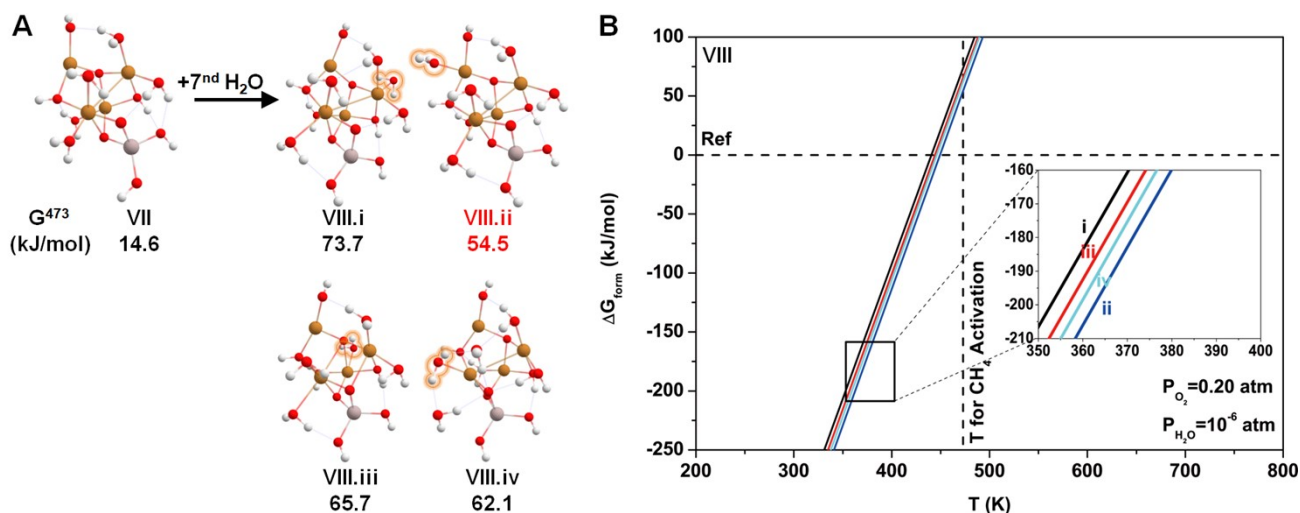

**Fig. S13.** (A) Optimized geometric structures and (B) corresponding phase diagram of the variants obtained by adding a H<sub>2</sub>O (bubbles highlighted) on various sites of configuration VII. White, red, golden, and light peach spheres represent H, O, Cu, and Al atoms, respectively. The phase diagram was drawn at the experimental partial pressure of methane activation ( $P_{O_2} = 0.2$  atm,  $P_{H_2O} = 10^{-6}$  atm). Configuration VIII.ii is the most stable among these variants at the studied temperature range and thereby simplified as VIII.

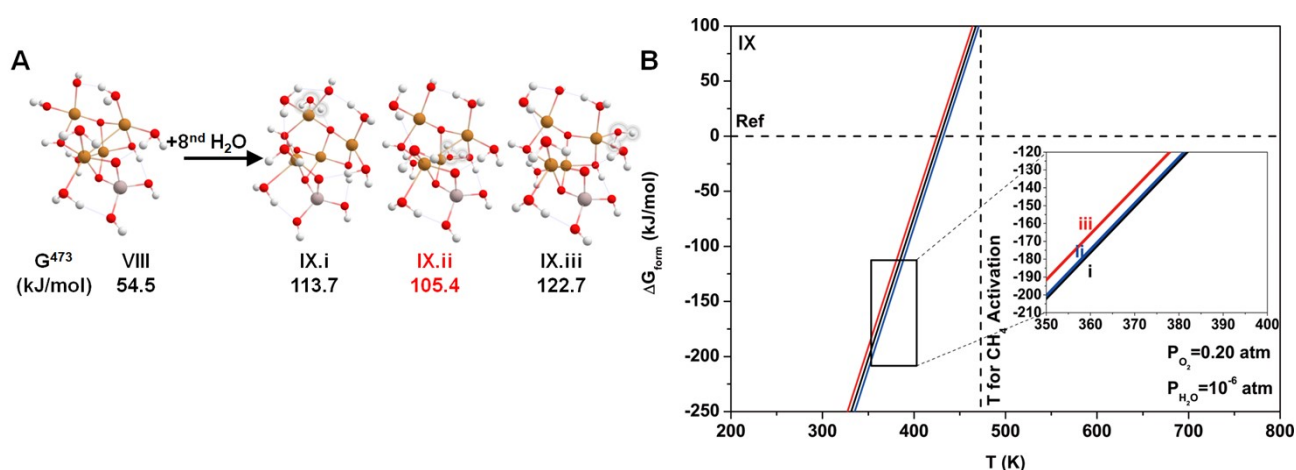

**Fig. S14.** (A) Optimized geometric structures and (B) corresponding phase diagram of the variants obtained by adding a H<sub>2</sub>O (bubbles highlighted) on various sites of configuration VIII. White, red, golden, and light peach spheres represent H, O, Cu, and Al atoms, respectively. The phase diagram

was drawn at the experimental partial pressure of methane activation ( $P_{O_2} = 0.2$  atm,  $P_{H_2O} = 10^{-6}$  atm). Configuration IX.ii is the most stable among these variants at the studied temperature range and thereby simplified as IX.

**Table. S3.** Evolution of key bond lengths (Å) around the active oxygen sites over time in AIMD simulations for configurations I.9, I.19, I.53, V.1, V.4, and V.6.

|                                                                                             | Bond                                                                                       | 0 fs   | 50 fs | 100 fs | 150 fs | 200 fs |       |
|---------------------------------------------------------------------------------------------|--------------------------------------------------------------------------------------------|--------|-------|--------|--------|--------|-------|
| 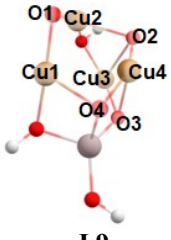<br>I.9    | O1-Cu1                                                                                     | 1.815  | 1.778 | 1.747  | 1.788  | 1.771  |       |
|                                                                                             | O1-Cu2                                                                                     | 1.823  | 1.811 | 1.802  | 1.742  | 1.766  |       |
|                                                                                             | O2-Cu2                                                                                     | 2.008  | 1.993 | 1.986  | 1.982  | 1.980  |       |
|                                                                                             | O2-Cu3                                                                                     | 1.851  | 2.020 | 1.995  | 1.972  | 1.951  |       |
|                                                                                             | O2-Cu4                                                                                     | 2.049  | 1.977 | 2.079  | 2.141  | 2.159  |       |
|                                                                                             | O3-Cu3                                                                                     | 1.860  | 1.845 | 1.828  | 1.811  | 1.801  |       |
|                                                                                             | O3-Cu4                                                                                     | 2.095  | 2.070 | 2.050  | 2.041  | 2.044  |       |
|                                                                                             | O4-Cu1                                                                                     | 2.051  | 2.050 | 2.057  | 2.074  | 2.103  |       |
|                                                                                             | O4-Cu4                                                                                     | 1.862  | 1.778 | 1.716  | 1.701  | 1.739  |       |
|                                                                                             | <br>I.19 | O1-Cu1 | 1.783 | 1.758  | 1.742  | 1.741  | 1.756 |
| O1-Cu3                                                                                      |                                                                                            | 1.796  | 1.790 | 1.782  | 1.773  | 1.764  |       |
| O2-Cu1                                                                                      |                                                                                            | 1.776  | 1.813 | 1.843  | 1.854  | 1.842  |       |
| O2-Cu2                                                                                      |                                                                                            | 1.793  | 1.858 | 1.909  | 1.933  | 1.925  |       |
| O3-Cu2                                                                                      |                                                                                            | 1.971  | 1.949 | 1.931  | 1.921  | 1.920  |       |
| O3-Cu4                                                                                      |                                                                                            | 1.858  | 1.848 | 1.844  | 1.849  | 1.860  |       |
| O4-Cu3                                                                                      |                                                                                            | 1.905  | 1.866 | 1.837  | 1.828  | 1.838  |       |
| O4-Cu4                                                                                      |                                                                                            | 2.031  | 2.003 | 1.976  | 1.953  | 1.934  |       |
| <br>I.53 |                                                                                            | O1-Cu1 | 1.778 | 1.768  | 1.762  | 1.765  | 1.775 |
|                                                                                             |                                                                                            | O1-Cu4 | 1.810 | 1.830  | 1.843  | 1.845  | 1.834 |
|                                                                                             | O2-Cu1                                                                                     | 1.765  | 1.828 | 1.872  | 1.885  | 1.865  |       |
|                                                                                             | O2-Cu2                                                                                     | 1.762  | 1.730 | 1.710  | 1.710  | 1.728  |       |
|                                                                                             | O3-Cu2                                                                                     | 1.753  | 1.727 | 1.712  | 1.714  | 1.729  |       |
|                                                                                             | O3-Cu3                                                                                     | 1.777  | 1.812 | 1.834  | 1.832  | 1.807  |       |
|                                                                                             | O4-Cu3                                                                                     | 1.961  | 1.984 | 2.012  | 2.047  | 2.086  |       |
|                                                                                             | O4-Cu4                                                                                     | 1.899  | 1.915 | 1.928  | 1.934  | 1.930  |       |
|                                                                                             | <br>V.1 | O1-Cu1 | 1.901 | 1.908  | 1.916  | 1.922  | 1.920 |
|                                                                                             |                                                                                            | O1-Cu2 | 1.964 | 2.026  | 2.080  | 2.118  | 2.136 |
| O1-Cu3                                                                                      |                                                                                            | 1.991  | 2.014 | 2.037  | 2.056  | 2.070  |       |
| O2-Cu3                                                                                      |                                                                                            | 1.984  | 1.979 | 1.978  | 1.980  | 1.985  |       |
| O2-Cu4                                                                                      |                                                                                            | 2.039  | 2.075 | 2.110  | 2.138  | 2.158  |       |
| O3-Cu4                                                                                      |                                                                                            | 1.816  | 1.776 | 1.749  | 1.744  | 1.761  |       |
| <br>V.4  |                                                                                            | O1-Cu1 | 1.886 | 1.863  | 1.836  | 1.812  | 1.796 |
|                                                                                             |                                                                                            | O1-Cu2 | 1.850 | 1.868  | 1.893  | 1.912  | 1.922 |
|                                                                                             | O1-Cu4                                                                                     | 1.943  | 1.992 | 2.027  | 2.044  | 2.041  |       |
|                                                                                             | O2-Cu3                                                                                     | 1.896  | 1.902 | 1.911  | 1.925  | 1.942  |       |
|                                                                                             | O2-Cu4                                                                                     | 1.938  | 1.973 | 2.003  | 2.023  | 2.028  |       |
|                                                                                             | <br>V.6 | O1-Cu1 | 1.990 | 1.869  | 1.798  | 1.762  | 1.773 |
| O1-Cu2                                                                                      |                                                                                            | 1.941  | 1.896 | 1.888  | 1.882  | 1.880  |       |
| O1-Cu3                                                                                      |                                                                                            | 2.235  | 2.160 | 2.186  | 2.205  | 2.213  |       |

|        |       |       |       |       |       |
|--------|-------|-------|-------|-------|-------|
| O1-Cu4 | 2.032 | 2.301 | 2.325 | 2.324 | 2.291 |
| O2-Cu3 | 1.833 | 1.797 | 1.798 | 1.815 | 1.835 |
| O2-Cu4 | 1.945 | 1.986 | 2.000 | 2.005 | 1.994 |

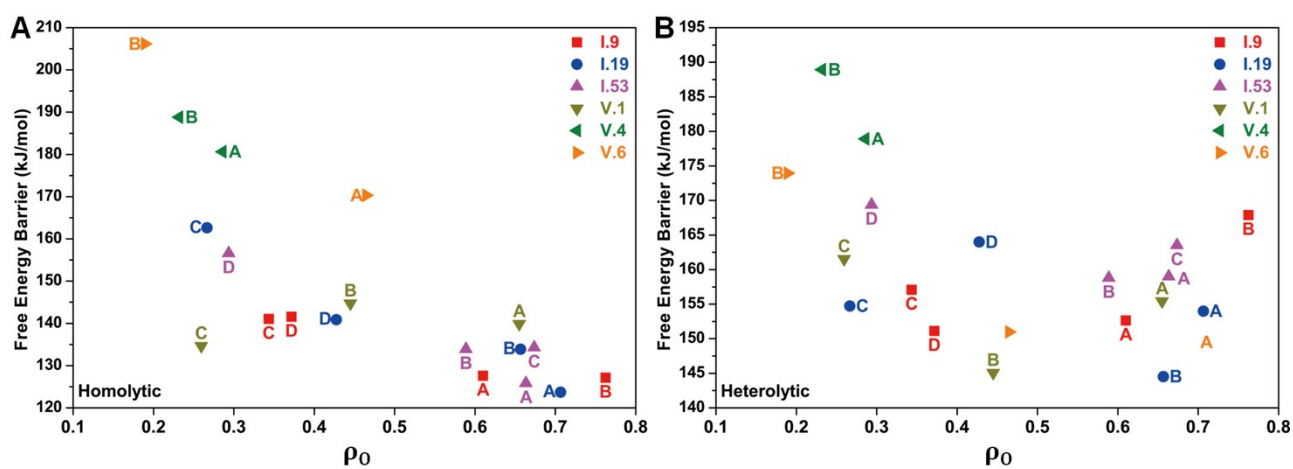

**Fig. S15.** Correlations between the spin density on the oxygen atom ( $\rho_0$ ) and the DFT-computed (A)  $\Delta G_{homo}^\ddagger$  and (B)  $\Delta G_{heter}^\ddagger$  for methane activation at each oxygen site on I.9, I.19, I.53, V.1, V.4, and V.6.

DFT optimized key structure coordinates are provided in separate files as follows:

1. **Figure 1:**
  - Files: **i.xyz, ii.xyz, iii.xyz, iv.xyz**
  - Location: **Str-1/Str-Fig1**
2. **Figure 2:**
  - Files: **Ref.xyz, I.xyz, II.xyz, III.xyz, IV.xyz, V.xyz, VI.xyz, VII.xyz, VIII.xyz, IX.xyz**
  - Location: **Str-1/Str-Fig2**
3. **Figure 3:**
  - Files: **I.1.xyz to I.64.xyz**
  - Location: **Str-2/Str-Fig3-part1, Str-3/Str-Fig3-part2**
4. **Figure 5:**
  - Files:
    - **I.9-homolytic-A.xyz to I.9-homolytic-D.xyz**
    - **I.9-heterolytic-A.xyz to I.9-heterolytic-D.xyz**
    - **I.19-homolytic-A.xyz to I.19-homolytic-D.xyz**
    - **I.19-heterolytic-A.xyz to I.19-heterolytic-D.xyz**
    - **I.53-homolytic-A.xyz to I.53-homolytic-D.xyz**
    - **I.53-heterolytic-A.xyz to I.53-heterolytic-D.xyz**
  - Location: **Str-4/Str-Fig5**
5. **Figure 6:**
  - Files: **V.1.xyz to V.19.xyz**
  - Location: **Str-5/Str-Fig6**
6. **Figure 7:**
  - Files:
    - **V.1-homolytic-A.xyz to V.1-homolytic-C.xyz**
    - **V.1-heterolytic-A.xyz to V.1-heterolytic-C.xyz**
    - **V.4-homolytic-A.xyz to V.4-homolytic-C.xyz**
    - **V.4-heterolytic-A.xyz to V.4-heterolytic-C.xyz**
    - **V.6-homolytic-A.xyz to V.6-homolytic-C.xyz**
    - **V.6-heterolytic-A.xyz to V.6-heterolytic-C.xyz**
  - Location: **Str-5/Str-Fig7**

## References

1. H. A. Doan, Z. Li, O. K. Farha, J. T. Hupp and R. Q. Snurr, *Catal. Today*, 2018, **312**, 2–9.
2. D. Feng, Z.-Y. Gu, J.-R. Li, H.-L. Jiang, Z. Wei and H.-C. Zhou, *Angew. Chem.*, 2012, **124**, 10453–10456.
3. F. Neese, *Wiley Interdiscip. Rev. Comput. Mol. Sci.*, 2012, **2** (1), 73–78.
4. A.P. Ginsberg, *J. Am. Chem. Soc.*, 1980, **102**, 111.
5. L. Noodleman, *J. Chem. Phys.*, 1981, **74**, 5737.
6. L. Noodleman and E.R. Davidson, *Chem. Phys.*, 1986, **109**, 131.
